# Supplementary material for: Pirfenidone exacerbates Th2-driven vasculopathy in a mouse model of systemic sclerosis-associated interstitial lung disease
Source: PubMed Central journal article supplement (PMC9582508; doi:10.1183/13993003.02347-2021), 2022-10-20

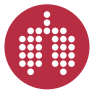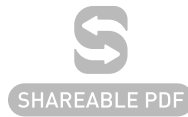

# Pirfenidone exacerbates Th2-driven vasculopathy in a mouse model of systemic sclerosis-associated interstitial lung disease

Anna Birnhuber <sup>1,2</sup>, Katharina Jandl<sup>1,3</sup>, Valentina Biasin<sup>1,2</sup>, Elisabeth Fließer<sup>1</sup>, Francesco Valzano<sup>1</sup>, Leigh M. Marsh <sup>1</sup>, Christina Krolczik<sup>4</sup>, Andrea Olschewski <sup>1,5</sup>, Jochen Wilhelm<sup>6</sup>, Wolfgang Toller<sup>5</sup>, Akos Heinemann<sup>3</sup>, Horst Olschewski<sup>1,7</sup>, Malgorzata Wygrecka<sup>4</sup> and Grazyna Kwapiszewska<sup>1,2,8</sup>

<sup>1</sup>Ludwig Boltzmann Institute for Lung Vascular Research Graz, Graz, Austria. <sup>2</sup>Otto Loewi Research Center, Division of Physiology, Medical University of Graz, Graz, Austria. <sup>3</sup>Otto Loewi Research Center, Division of Pharmacology, Medical University of Graz, Graz, Austria. <sup>4</sup>Center for Infection and Genomics of the Lung, Universities of Giessen and Marburg Lung Center, Member of the German Center for Lung Research, Giessen, Germany. <sup>5</sup>Dept of Anaesthesiology and Intensive Care Medicine, Medical University of Graz, Graz, Austria. <sup>6</sup>Dept of Internal Medicine, Universities of Giessen and Marburg Lung Center, Giessen, Germany. <sup>7</sup>Division of Pulmonology, Dept of Internal Medicine, Medical University of Graz, Graz, Austria. <sup>8</sup>Institute for Lung Health (ILH), Justus Liebig University, Giessen, Germany.

Corresponding author: Grazyna Kwapiszewska ([Grazyna.Kwapiszewska@lvr.lbg.ac.at](mailto:Grazyna.Kwapiszewska@lvr.lbg.ac.at))

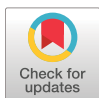

Shareable abstract (@ERSpublications)

**Pirfenidone worsens vascular and pulmonary dysfunction in a SSC-ILD mouse model due to its negative effects on primed endothelial cells and may lead to unfavourable effects in patients with underlying type 2 inflammation as seen in SSC-ILD** <https://bit.ly/3Jk821j>

**Cite this article as:** Birnhuber A, Jandl K, Biasin V, *et al.* Pirfenidone exacerbates Th2-driven vasculopathy in a mouse model of systemic sclerosis-associated interstitial lung disease. *Eur Respir J* 2022; 60: 2102347 [DOI: 10.1183/13993003.02347-2021].

This single-page version can be shared freely online.

Copyright ©The authors 2022.

This version is distributed under the terms of the Creative Commons Attribution Licence 4.0.

This article has an editorial commentary:  
<https://doi.org/10.1183/13993003.01301-2022>

Received: 27 Aug 2021  
Accepted: 8 March 2022

## Abstract

**Background** Systemic sclerosis (SSc) is an autoimmune disease characterised by severe vasculopathy and fibrosis of various organs including the lung. Targeted treatment options for SSc-associated interstitial lung disease (SSc-ILD) are scarce. We assessed the effects of pirfenidone in a mouse model of SSc-ILD.

**Methods** Pulmonary function, inflammation and collagen deposition in response to pirfenidone were assessed in Fra-2-overexpressing transgenic (Fra-2 TG) and bleomycin-treated mice. In Fra-2 TG mice, lung transcriptome was analysed after pirfenidone treatment. *In vitro*, pirfenidone effects on human eosinophil and endothelial cell function were analysed using flow cytometry-based assays and electric cell-substrate impedance measurements, respectively.

**Results** Pirfenidone treatment attenuated pulmonary remodelling in the bleomycin model, but aggravated pulmonary inflammation, fibrosis and vascular remodelling in Fra-2 TG mice. Pirfenidone increased interleukin (IL)-4 levels and eosinophil numbers in lung tissue of Fra-2 TG mice without directly affecting eosinophil activation and migration *in vitro*. A pronounced immune response with high levels of cytokines/chemokines and disturbed endothelial integrity with low vascular endothelial (VE)-cadherin levels was observed in pirfenidone-treated Fra-2 TG mice. In contrast, eosinophil and VE-cadherin levels were unchanged in bleomycin-treated mice and not influenced by pirfenidone. *In vitro*, pirfenidone exacerbated the IL-4 induced reduction of endothelial barrier resistance, leading to higher leukocyte transmigration.

**Conclusion** This study shows that antifibrotic properties of pirfenidone may be overruled by unwanted interactions with pre-injured endothelium in a setting of high T-helper type 2 inflammation in a model of SSc-ILD. Careful ILD patient phenotyping may be required to exploit benefits of pirfenidone while avoiding therapy failure and additional lung damage in some patients.

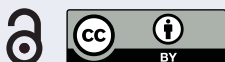

Supplement: ERJ-02347-2021.Shareable.pdf [file ERJ-02347-2021.Shareable.pdf]
